# Supplementary material for: Melanopsin (Opn4) is an oncogene in cutaneous melanoma
Source: PubMed Central journal article supplement (PMC9106662; doi:10.1038/s42003-022-03425-6), 2022-05-13
Supplement: 42003_2022_3425_MOESM2_ESM.pdf [file 42003_2022_3425_MOESM2_ESM.pdf]

# 1 Supplementary Figures

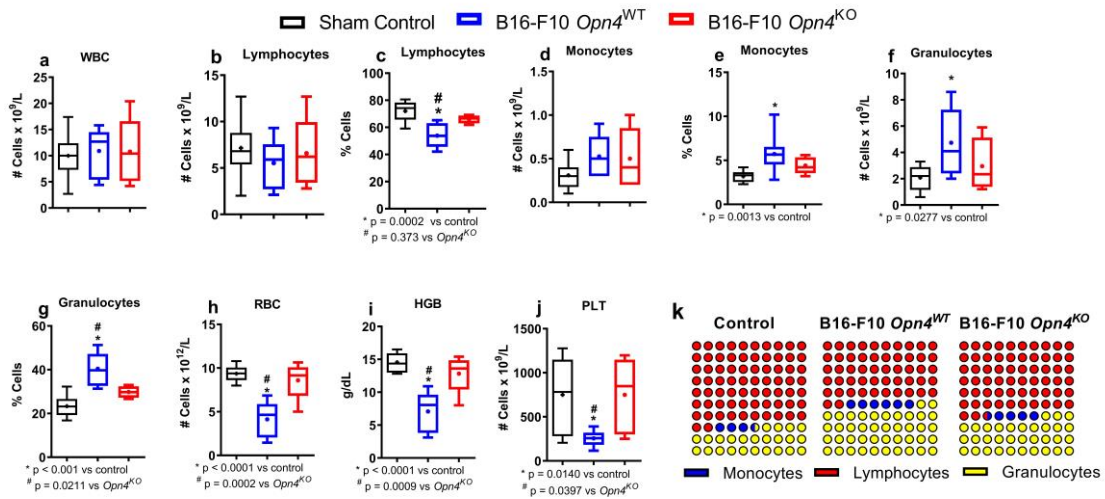

2

3 **Figure S1.** Hemogram analyses comprised of absolute number of white blood cells (a), absolute number  
 4 and percentage of lymphocytes (b – c), monocytes, (d – e), and granulocytes (f – g) in comparison to total  
 5 white blood cells. Absolute number of red blood cells (h), hemoglobin content (i), and platelet absolute  
 6 number (j). A representative graph of monocytes, lymphocytes, and granulocytes is shown in k. In a and b,  
 7 n = 10, 9, and 5 for sham, B16-F10 *Opn4*<sup>WT</sup>, and B16-F10 *Opn4*<sup>KO</sup> groups, respectively. In c, n = 9, 9, and  
 8 4, respectively. In d, n = 10, 8, and 5, respectively. In e, n = 10, 10, and 5, respectively. In f, n = 8, 9, and  
 9 4, respectively. In g, n = 9, 9, and 4, respectively. In h – i, n = 10, 10, and 5, respectively. In j, n = 9, 9, and  
 10 5, respectively. In every analyzes, the n number is derived from independent samples. Asterisk represents  
 11 differences between tumor-bearing and sham (control) animals while hashtag indicates differences between  
 12 *Opn4*<sup>WT</sup> and *Opn4*<sup>KO</sup>. p values are shown in each condition.

13

14

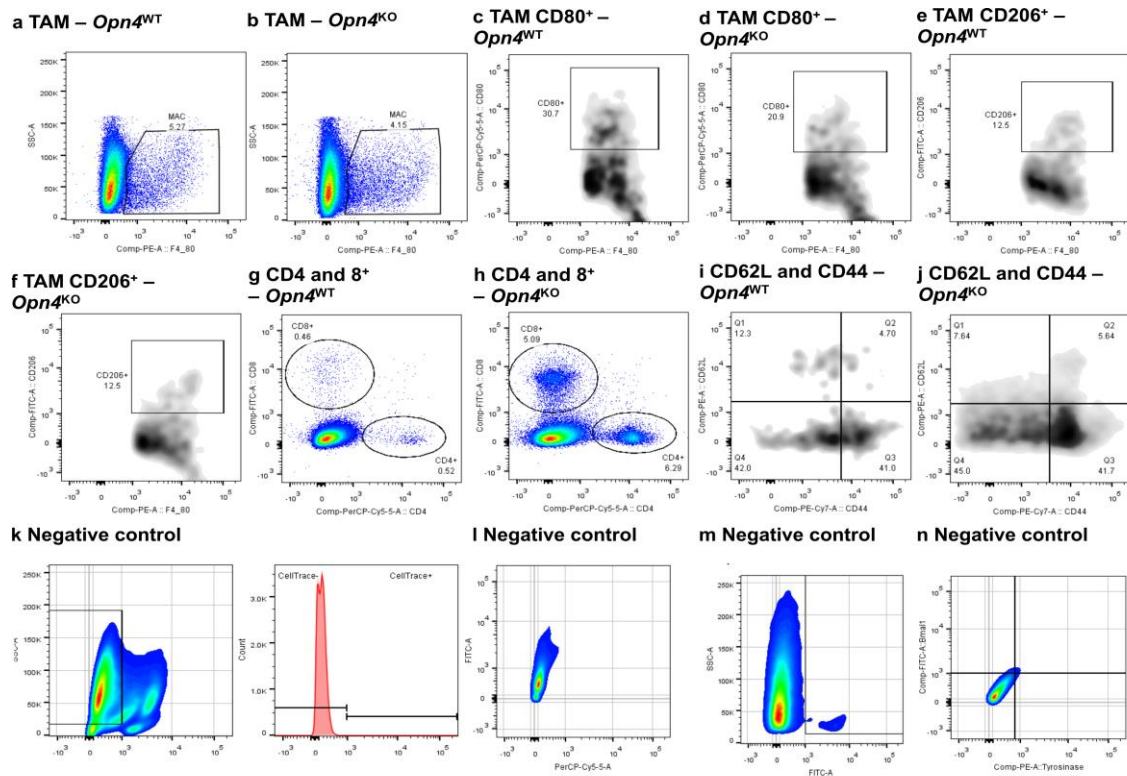

15

16 **Figure S2.** Representative flow cytometry gates of total (a – b), M1 (c – d, CD80+) and M2 (e – f, 206+) macrophages, and CD4+ and CD8+ naïve (g – h), central (CD44+ and CD62L+), and effector memory (CD44+ and CD62L-, i – j) lymphocytes of tumor and spleen samples from *Opn4*<sup>WT</sup> and *Opn4*<sup>KO</sup> tumor-bearing mice. k) Negative control of CellTrace experiment (Described in Fig. 2). l) Negative control of cell cycle experiment using BrDU and 7-AAD (Described in Fig. 2). m) Negative control of *in vitro* and n) *in vivo* experiments (Described in Fig. 3 and 5, respectively).

22

23

24

25

26

27

28

29

30

31

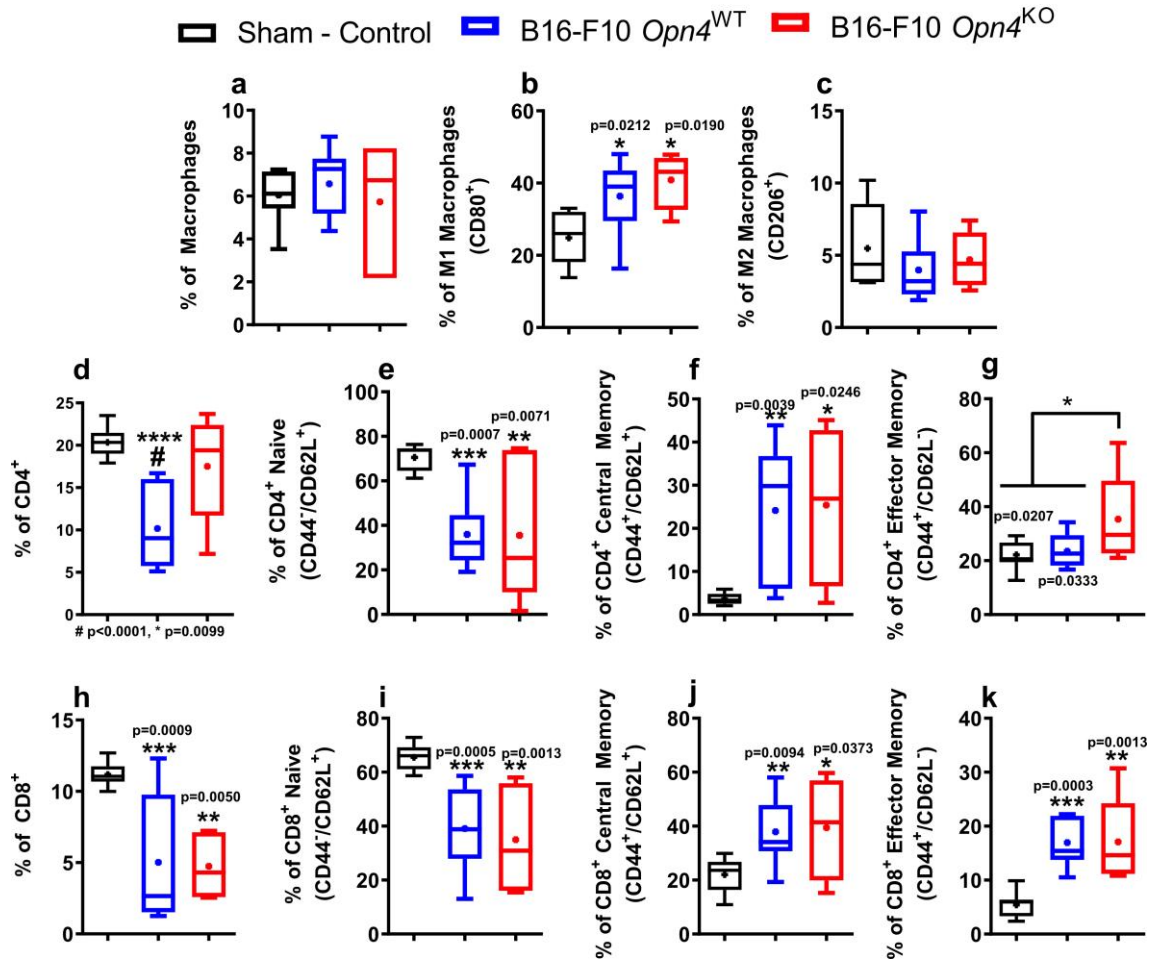

32

33 **Figure S3.** Evaluation of immune system cells in spleen of sham control, *Opn4*<sup>KO</sup> and *Opn4*<sup>WT</sup> tumor-  
 34 bearing mice. Frequency of macrophages (a – c), T CD4<sup>+</sup> (d – g), and CD8<sup>+</sup> (h – k) lymphocytes and their  
 35 respective subtypes in spleens of *Opn4*<sup>KO</sup> and *Opn4*<sup>WT</sup> tumor-bearing and sham control mice. Subtypes of  
 36 each cell population are indicated in the Y axis. In a, n = 8, 13, and 7 for sham, B16-F10 *Opn4*<sup>WT</sup>, and B16-  
 37 F10 *Opn4*<sup>KO</sup> groups, respectively. In b, n = 9, 12, and 4, respectively. In c, n = 8, 11, and 6, respectively.  
 38 In d, n = 10, 12, and 5, respectively. In e, n = 9, 11, and 6, respectively. In f, n = 9, 12, and 4, respectively.  
 39 In g, n = 10, 12, and 6, respectively. In h, n = 8, 12, and 5, respectively. In i, n = 9, 12, and 5, respectively.  
 40 In j, n = 10, 11, and 4, respectively. In k, n = 8, 9, and 5, respectively. In every analyzes, the n number is  
 41 derived from independent samples. Representative gate strategy is shown in Figure S2. Asterisks represent  
 42 differences between *Opn4*<sup>WT</sup> and *Opn4*<sup>KO</sup> tumor-bearing mice compared to sham control mice. Hashtag  
 43 represents differences between *Opn4*<sup>WT</sup> tumor-bearing mice and sham control animals. Brackets indicate  
 44 the differences between *Opn4*<sup>KO</sup> tumor-bearing mice and the remaining groups.

45

46

47

48

49

50

51

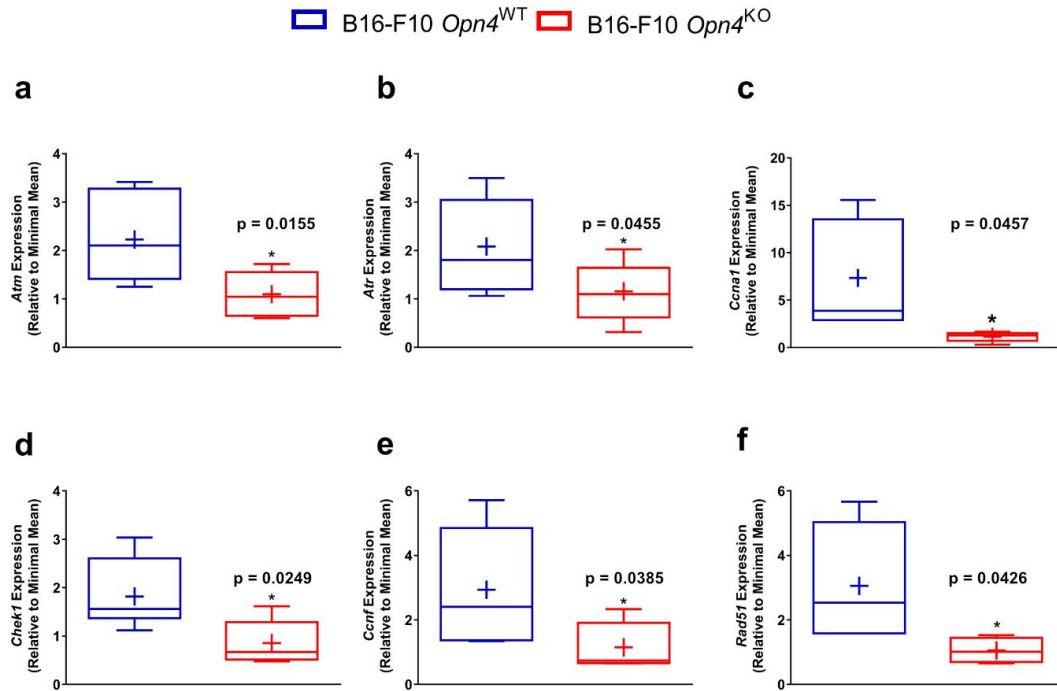

52

53 **Figure S4.** Gene expression in tumor bulk of *Opn4*<sup>KO</sup> and *Opn4*<sup>WT</sup> tumors. a – f) *In vivo* expression of cell  
 54 cycle-related genes of *Opn4*<sup>WT</sup> and *Opn4*<sup>KO</sup> tumor bulk. In a, n = 7 and 6 for *Opn4*<sup>KO</sup> and *Opn4*<sup>WT</sup> tumors,  
 55 respectively; in b, n = 8 and 7, respectively. in c, n = 5 for both groups; in d, n = 7 and 5, respectively. in e,  
 56 n = 8 and 6, respectively. in f, n = 7 and 5, respectively. In every analyzes, the n number is derived from  
 57 independent sample. Gene name is shown in the Y-axis. \* p < 0.05.

58

59

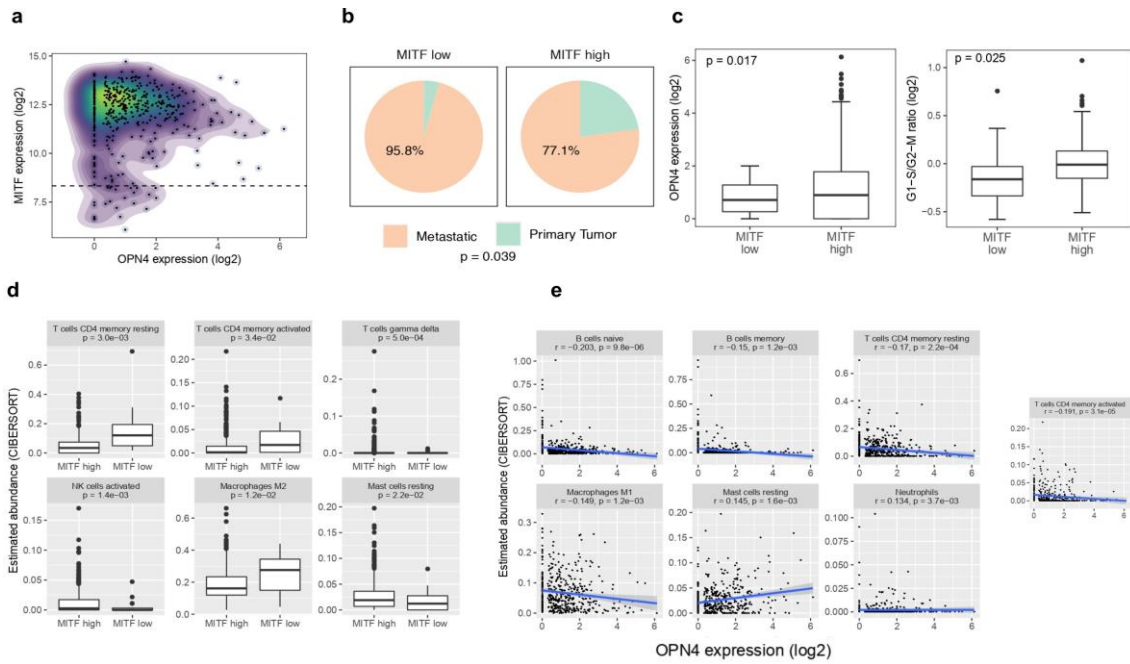

60  
 61 **Figure S5.** Bioinformatics analyses of TCGA RNA-seq data from melanoma tumors. a) *MITF* and *OPN4*  
 62 expression in 103 primary melanomas and 368 metastatic melanomas. Tumors were stratified into high and  
 63 low *MITF* expression based on the 5<sup>th</sup> percentile (dashed line). b) Proportion of *MITF* high and low tumors  
 64 in primary and metastatic disease. c) *OPN4* expression and the inferred G1/S vs. G2/M ratio in low and  
 65 high *MITF* tumors. d) Abundance of tumor-infiltrating immune cells estimated by the CIBERSORT  
 66 algorithm in high and low *MITF* tumors. e) Correlation analyses between estimated abundances and *OPN4*  
 67 expression.

68

69

70

71 **Supplementary Table S1**

| <b>Drug's Name</b> | <b>Target</b>                                         | <b>Vehicle</b> | <b>Concentration used</b> |
|--------------------|-------------------------------------------------------|----------------|---------------------------|
| BAPTA-AM           | Calcium chelator                                      | DMSO           | 10 $\mu$ M                |
| Dexamethasone      | Specific GR activator                                 | PBS            | 200 nM                    |
| Forskolin          | Adenylyl cyclase activator                            | DMSO           | 10 $\mu$ M                |
| KN-93              | Calcium/calmodulin-dependent protein kinase activator | DMSO           | 9 $\mu$ M                 |
| L-Name             | Oxide nitric synthase inhibitor                       | PBS            | 10 – 20 mM                |
| ODQ -              | Guanylyl cyclase inhibitor                            | DMSO           | 50 $\mu$ M                |
| U-73122            | Phospholipase C inhibitor                             | DMSO           | 10 $\mu$ M                |

72 DMSO concentration was never higher than 2% during experiments. Drugs' concentration was based on a  
73 previous study <sup>44</sup>.

74

75

76

77

78

79

80

81

82

83 **Supplementary Table S2**

| <b>Templates<br/>(Access numbers)</b> | <b>Primers and probes (5' – 3')</b>                                                                                   |
|---------------------------------------|-----------------------------------------------------------------------------------------------------------------------|
| <i>Atm</i><br>(NM_007499.3)           | For: AACCATGCTTGCTGTTGTCG<br>Rev: AATCCAGCCAGAAAGCGTCA                                                                |
| <i>Atr</i><br>(NM_019864.1)           | For: CCTCAAACCGCTTTTTTCGCA<br>Rev: ATCCGGCCTTTTGTTGAGACT                                                              |
| <i>Bmal1</i><br>(NM_001243048)        | For: AAGCTTCTGCACAATCCACAGCAC<br>Rev: TGTCTGGCTCATTGTCTTCGTCCA<br>Probe: 5'-/5HEX/AAAGCTGGCCACCCACGAAGATGGG/BHQ_1/-3' |
| <i>Ccnal</i><br>(NM_007628.3)         | For: GAAATTGCAGCTTGTCGGGA<br>Rev: TGCCAGGACTTTGAGTAGCAG                                                               |
| <i>Ccnf</i><br>(NM_007634.4)          | For: TCCACGATGATGCACCCAAA<br>Rev: TTTCTCGCTTCCGTTTGCTC                                                                |
| <i>Chekl</i><br>(NM_007691.5)         | For: TGTGCATTTGGATTCTGTGG<br>Rev: CTATGGCCCGCTTCATGTCTA                                                               |
| <i>Gzmf</i><br>NM_010374              | For: GCTGGGGGAGAACATCCATC<br>Rev: TGTCTGTTTAGCCCATAGGT                                                                |
| <i>Il-10</i><br>NM_010548             | For: GCTCTTACTGACTGGCATGAG<br>Rev: CGCAGCTCTAGGAGCATGTG                                                               |
| <i>Il-1β</i><br>NM_008361             | For: GCAACTGTTCTGAACTCAACT<br>Rev: ATCTTTTGGGGTCCGTCAACT                                                              |
| <i>Il-6</i><br>NM_010559              | For: CCTGAGACTCAAGCAGAAATGG<br>Rev: AGAAGGAAGGTCCGGCTTCAGT                                                            |
| <i>Mitf</i><br>(NM_001113198.1)       | For: CCCAGGTATGAACACGCACT<br>Rev: CTGTGGGGAAAATACACGCTG                                                               |
| <i>Prfl</i><br>NM_011073              | For: AGCACAAGTTCGTGCCAGG<br>Rev: GCGTCTCTCATTAGGGAGTTTTT                                                              |
| <i>Rad51</i><br>(NM_011234.5)         | For: GCTGTTGCTTATGCACCGAA<br>Rev: AACTCAGTTGCCGTGGTGAA                                                                |
| <i>Rpl37a</i><br>(NM_009084.4)        | For: GCATGAAAACAGTGGCCGGT<br>Rev: CAGGGTCACACAGTATGTCTCAAAA                                                           |
| <i>Tgf-β</i><br>NM_009367             | For: CTTCGACGTGACAGACGCT<br>Rev: GCAGGGGCAGTGTAACCTTATT                                                               |

84 All primers were used at 300 nM except for the *Bmal1* probe (200 nM)

85
