# Supplementary material for: Melanopsin (Opn4) is an oncogene in cutaneous melanoma
Source: PubMed Central journal article supplement (PMC9106662; doi:10.1038/s42003-022-03425-6), 2022-05-13
Supplement: 42003_2022_3425_MOESM3_ESM.pdf [file 42003_2022_3425_MOESM3_ESM.pdf]

## Description of Additional Supplementary Files

**File name:** Supplementary Data 1

**Description:** Opn4<sup>WT</sup> tumor proteome based on proteins identified in at least two of four biological replicates.

**File name:** Supplementary Data 2

**Description:** Opn4<sup>KO</sup> tumor proteome based on proteins identified in at least two of four biological replicates.

**File name:** Supplementary Data 3

**Description:** Label-free quantification (LFQ) analysis of 992 identified proteins shared among the groups Opn4<sup>WT</sup> and Opn4<sup>KO</sup>.

**File name:** Supplementary Data 4

**Description:** Information (Uniprot Entry, Gene, Regulation, Average Area - Avg. Area, and notes) of differentially expressed or quantified proteins related to circadian rhythm, cell cycle (GO-term biological process), and MITF regulation, according to KEGG database, between Opn4<sup>WT</sup> and Opn4<sup>KO</sup> tumors.

**File name:** Supplementary Data 5

**Description:** Experimental data used to create the graphs from Figure 1 to 5 and from S1 to S5.
